# Supplementary material for: Open cells exhibit weaker entrainment of free-tropospheric biomass burning aerosol into the south-east Atlantic boundary layer
Source: Copernicus journal article supplement (doi:10.5194/acp-20-4059-2020), 2020-04-06
Supplement: Supplementary file 1 [file acp-20-4059-2020-supplement.pdf]

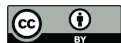

*Supplement of*

## **Open cells exhibit weaker entrainment of free-tropospheric biomass burning aerosol into the south-east Atlantic boundary layer**

**Steven J. Abel et al.**

*Correspondence to:* Steven Abel ([steven.abel@metoffice.gov.uk](mailto:steven.abel@metoffice.gov.uk))

The copyright of individual parts of the supplement might differ from the CC BY 4.0 License.

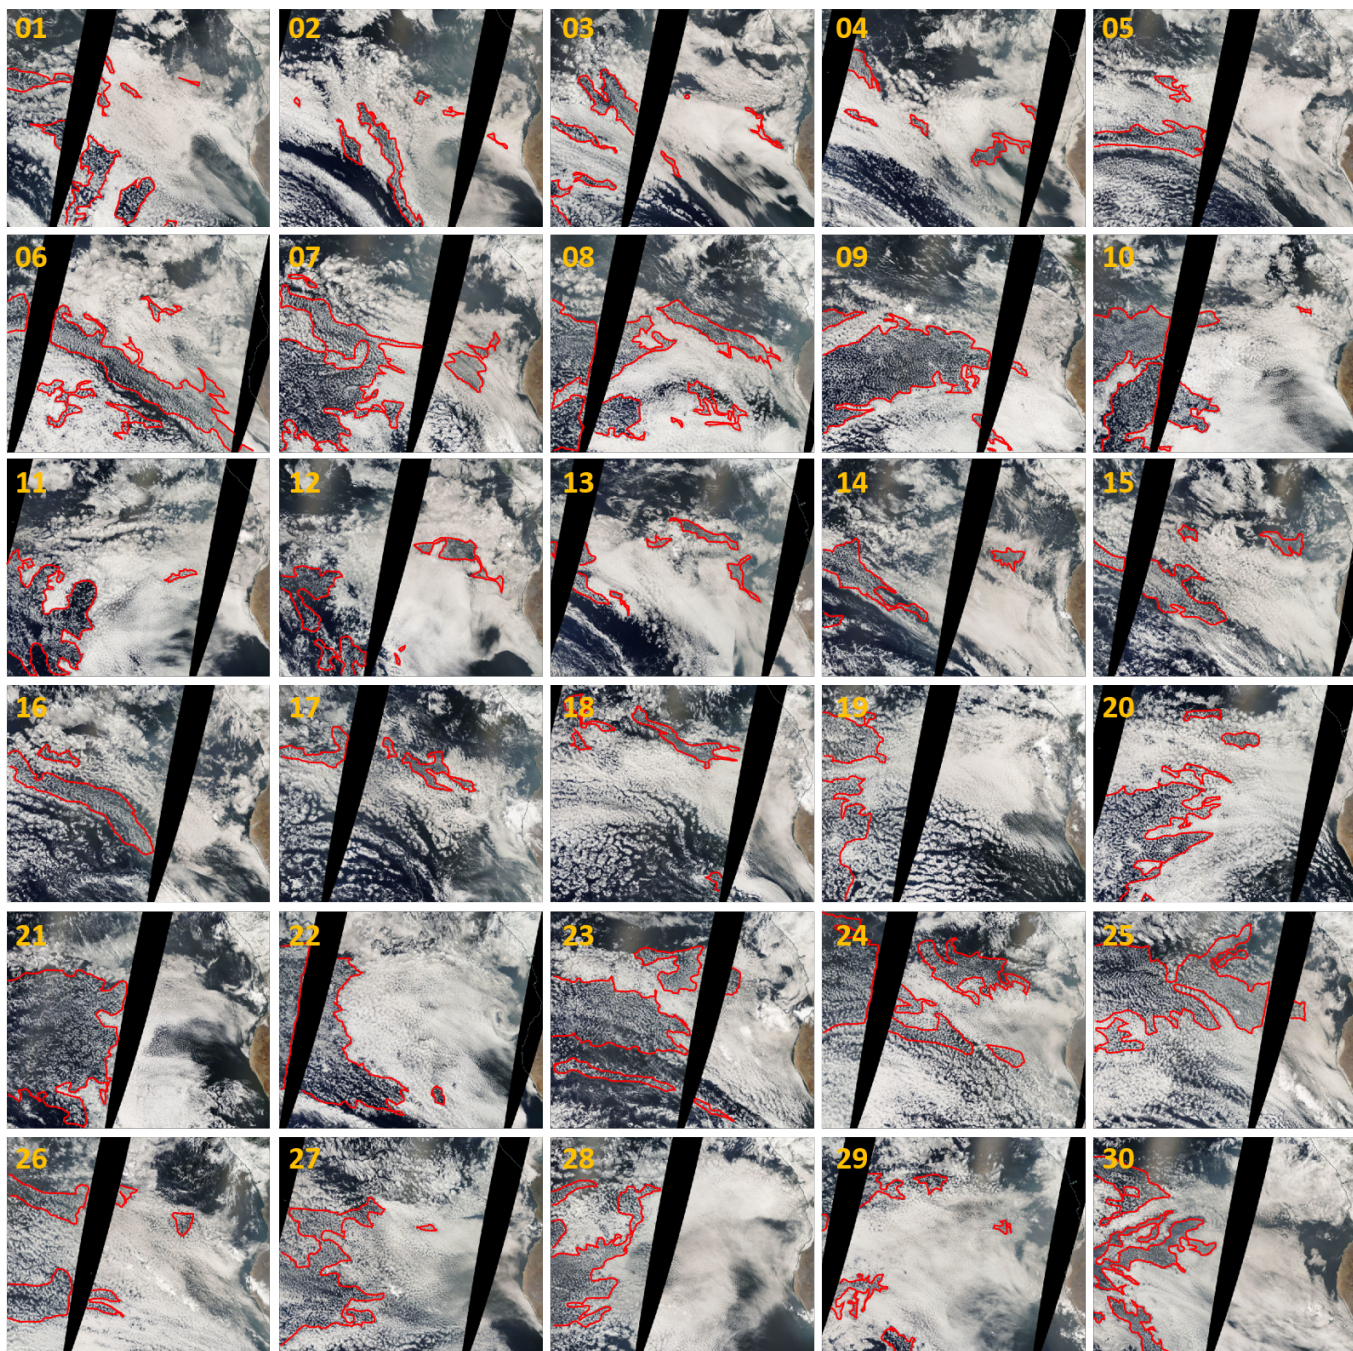

**Figure S 1.** Examples of the manual identification of open cell regions (outlined in red) from day-time MODIS Terra imagery, covering the period from the 1st to 30th September 2010. The MODIS imagery was obtained from NASA Worldview.
